# Supplementary material
Source: Springer Nature journal article supplement (https://www.springermedizin.de/resource/supplementary/12884_2012_795_MOESM1_ESM.pdf/9458218)
Supplement: MOESM1 [file 9458218]

Recruited to study (N=3234)

Pregnancy ended <20wks  $n=14$   
Termination/miscarriage >20wks  $n=12$   
Ineligible status identified after recruitment  $n=12$   
Lost to follow up  $n=26$

Initial study population  $n=3170$

BMI <25.0  $n=1742$   
Preterm births  $n=105$   
Prelabour caesarean  $n=138$   
Missing lipids  $n=2$

BMI  $\geq 25.0$   
laboured at term  $n=1183$

1st stage caesarean NOT for failure to progress  
 $n=83$   
2nd stage caesarean  $n=64$

Final study population  $n=1036$

Vaginal birth  $n=840$

1<sup>st</sup> stage caesarean for failure to progress  $n=196$
